# Supplementary material
Source: PubMed Central journal article supplement (PMC117407)

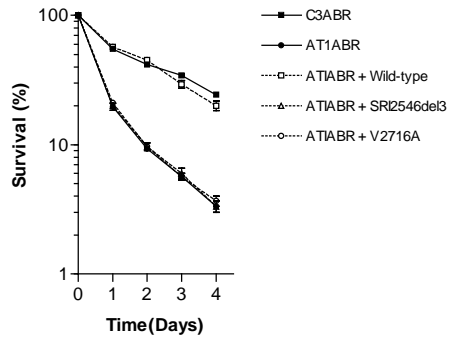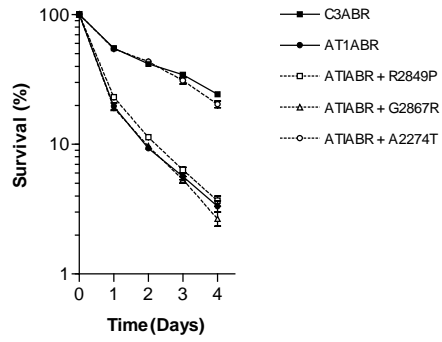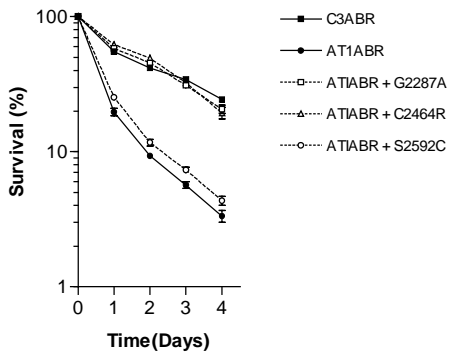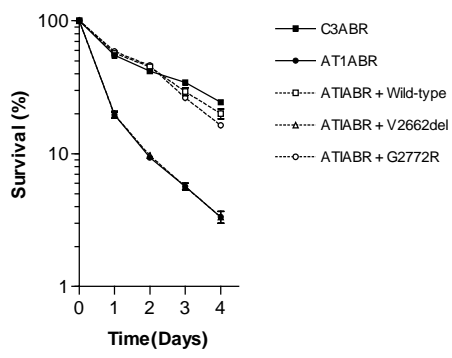

Supplement: pnas_99_2_925__3.pdf [file pnas_99_2_925__3.pdf]

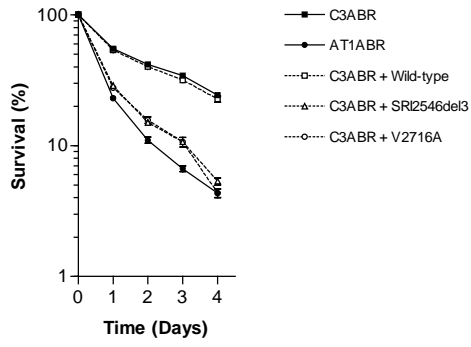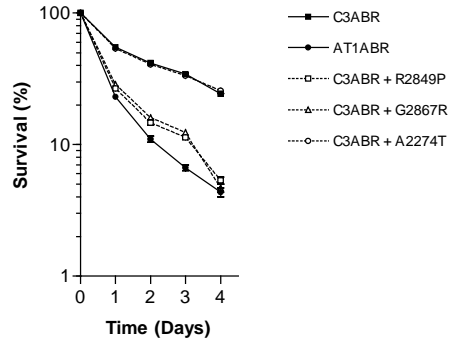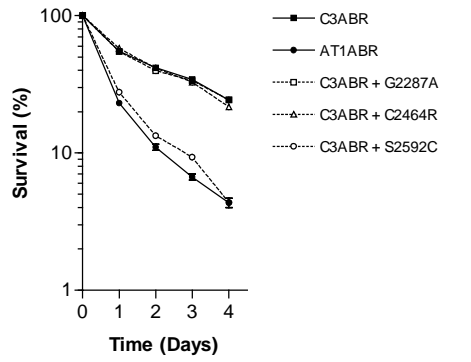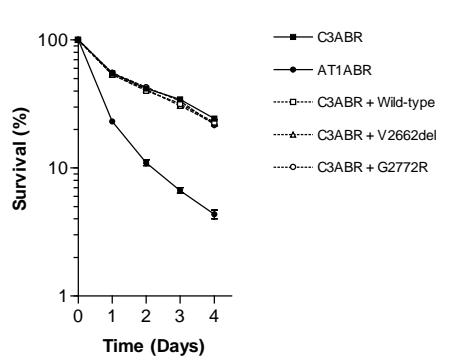

Supplement: pnas_99_2_925__4.pdf [file pnas_99_2_925__4.pdf]
